# Supplementary material for: Aeration and mineral composition of soil mediate microbial CUE
Source: Copernicus journal article supplement (doi:10.5194/soil-11-735-2025), 2025-10-01
Supplement: Supplementary file [file soil-11-735-2025-supplement-title-page.pdf › soil-11-735-2025-supplement-title-page.pdf]

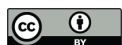

*Supplement of*

## **Aeration and mineral composition of soil mediate microbial CUE**

**Jolanta Niedźwiecka et al.**

*Correspondence to:* Roey Angel ([roey.angel@bc.cas.cz](mailto:roey.angel@bc.cas.cz)) and Hana Šantrůčková ([hasan@prf.jcu.cz](mailto:hasan@prf.jcu.cz))

- [soil-11-735-2025-supplement-title-page.pdf](#)
- [Supplementary\\_material\\_Revised.pdf](#)
- [Supplementary\\_tables\\_revised.xlsx](#)

The copyright of individual parts of the supplement might differ from the article licence.
